# Supplementary material
Source: PubMed Central journal article supplement (PMC5819619)
Supplement: NIHMS933734-supplement-Supplemental_Material.pdf [file NIHMS933734-supplement-Supplemental_Material.pdf]

## **SUPPLEMENTAL MATERIAL**

### **The utility of serum transthyretin as a prognostic indicator and predictor of outcome in cardiac amyloid disease associated with wild-type transthyretin**

Hanson; Transthyretin as a prognostic indicator in ATTRwt

Jacquelyn L.S. Hanson, PhD<sup>a,b</sup>; Marios Arvanitis, MD<sup>c</sup>; Clarissa M. Koch, PhD<sup>a,b\*</sup>; John L. Berk, MD<sup>a,c</sup>; Frederick L. Ruberg, MD<sup>a,c,d</sup>; Tatiana Prokaeva, MD, PhD<sup>a</sup>; Lawreen H. Connors, PhD<sup>a,b</sup>

<sup>a</sup>Amyloidosis Center, <sup>b</sup>Department of Pathology and Laboratory Medicine, <sup>c</sup>Department of Medicine, and <sup>d</sup>Section of Cardiovascular Medicine, Department of Medicine, Boston University School of Medicine, Boston, Massachusetts, USA

\*Present address: Department of Medicine, Division of Pulmonary and Critical Care, Northwestern University, Chicago, IL 60611

## Supplemental Tables

**Supplemental Table 1. ROC analysis before and after the chosen 4-year analysis.**

| Variable | 3-year analysis    |                | 4-year analysis    |                | 5-year analysis    |                |
|----------|--------------------|----------------|--------------------|----------------|--------------------|----------------|
|          | AUC (95% CI)       | <i>p</i> value | AUC (95% CI)       | <i>p</i> value | AUC (95% CI)       | <i>p</i> value |
| TTR      | 0.65 (0.50 – 0.80) | 0.06           | 0.69 (0.53 – 0.85) | 0.02           | 0.68 (0.52 – 0.84) | 0.02           |
| LVEF     | 0.68 (0.52 – 0.84) | 0.03           | 0.64 (0.48 – 0.79) | 0.08           | 0.58 (0.44 – 0.72) | 0.30           |
| cTn-I    | 0.63 (0.48 – 0.78) | 0.10           | 0.60 (0.45 – 0.74) | 0.20           | 0.55 (0.41 – 0.69) | 0.50           |
| combined | 0.72 (0.56 – 0.89) | 0.008          | 0.77 (0.60 – 0.94) | 0.002          | 0.72 (0.56 – 0.89) | 0.006          |

ROC indicates receiver operatic characteristic; AUC, area under the curve; CI, confidence interval; TTR, transthyretin; LVEF, left ventricular ejection fraction; and cTn-I, cardiac troponin.

**Supplemental Table 2. Changes in TTR, cTn-I, and LVEF in matched pairs of untreated/diflunisal-treated patients**

|        |           | OS predictor variable trends |          |               |          |          |          | Matching criteria* |                          |                   |             |
|--------|-----------|------------------------------|----------|---------------|----------|----------|----------|--------------------|--------------------------|-------------------|-------------|
|        |           | TTR (mg/dL)                  |          | cTn-I (ng/mL) |          | LVEF (%) |          | Age (y)            | BMI (kg/m <sup>2</sup> ) | Uric acid (mg/dL) | BNP (pg/mL) |
|        |           | Baseline                     | Δ 1-year | Baseline      | Δ 1-year | Baseline | Δ 1-year | Baseline           |                          |                   |             |
| Pair 1 | untreated | 20                           | -2       | 0.039         | 0.018    | 60       | 0        | 75.4               | 26                       | 7.7               | 321         |
|        | treated   | 20                           | 10       | 0.033         | -0.005   | 70       | -7       | 78.7               | 30                       | 6.0               | 499         |
| Pair 2 | untreated | 22                           | -2       | 0.083         | 0.017    | 56       | -1       | 73.2               | 25                       | 6.1               | 147         |
|        | treated   | 23                           | 9        | 0.088         | -0.022   | 29       | 8        | 76.7               | 24                       | 6.4               | 167         |
| Pair 3 | untreated | 28                           | -6       | 0.104         | 0.068    | 20       | 13       | 73.0               | 27                       | 6.8               | 395         |
|        | treated   | 24                           | 6        | 0.169         | -0.038   | 55       | 8        | 71.3               | 24                       | 4.7               | 238         |
| Pair 4 | untreated | 28                           | -1       | 0.055         | 0.037    | 49       | 3        | 62.6               | 31                       | 8.6               | 569         |
|        | treated   | 26                           | 7        | 0.057         | -0.005   | 61       | 1        | 67.7               | 32                       | 9.4               | 119         |
| Pair 5 | untreated | 25                           | -2       | 0.068         | 0.006    | 53       | 2        | 76.5               | 26                       | 5.6               | 769         |
|        | treated   | 26                           | 4        | 0.028         | 0        | 60       | -5       | 77.8               | 26                       | 6.4               | 323         |

\*Matching criteria included (in order of importance): TTR  $\pm$  4 mg/dL, age  $\pm$  5.1 y, BMI  $\pm$  4 kg/m<sup>2</sup>, Uric acid  $\pm$  2.1, cTn-I  $\pm$  0.06. All patients were within normal c-reactive protein (CRP) ranges. BNP values are listed as an additional cardiac biomarker reference for health status.

TTR indicates transthyretin; cTn-I, cardiac troponin I, LVEF, left ventricular ejection fraction; OS, overall survival; BMI, body mass index; BNP, b-type natriuretic peptide.

## Supplemental Figures and Figure Legends

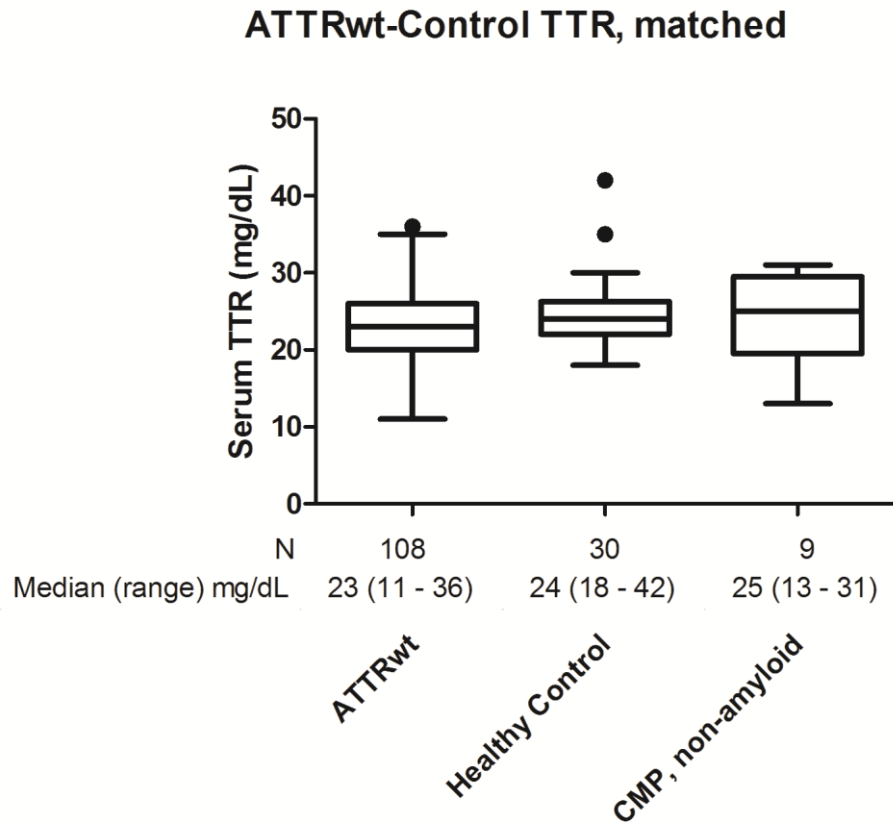

**Supplemental Figure 1. Baseline serum transthyretin (TTR) concentration in wild-type transthyretin amyloidosis (ATTRwt) compared to matched, healthy controls and matched non-amyloid cardiomyopathy (CMP) controls.** Depicted in Tukey box plots, baseline TTR values in the ATTRwt group, selected for Caucasian males over age 60 years ( $n = 108$ ), were not different from matched, healthy controls ( $n = 30$ ;  $p = 0.109$ ) nor matched non-amyloid CMP controls ( $n = 9$ ;  $p = 0.484$ ) using an unpaired two-sided t-test with Welch's correction. Number of cases (N) and median (range) values corresponding to each group are shown below the plot.

**A**

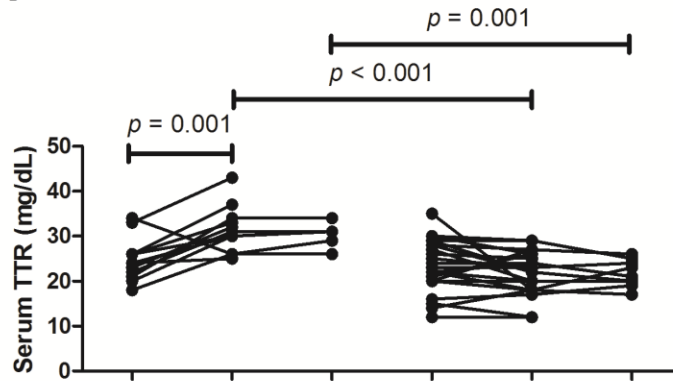

**B**

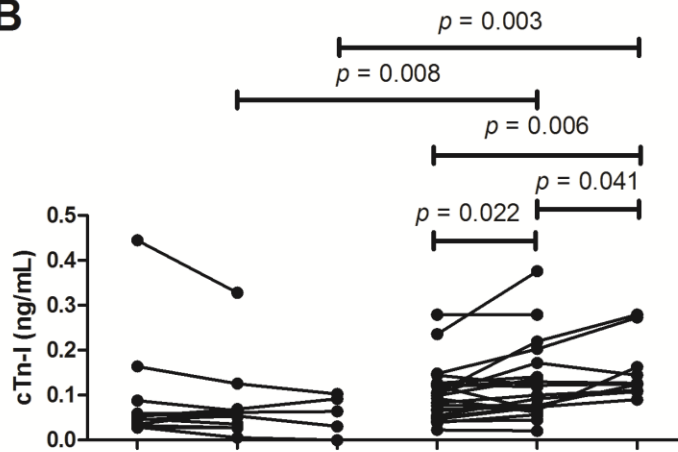

**C**

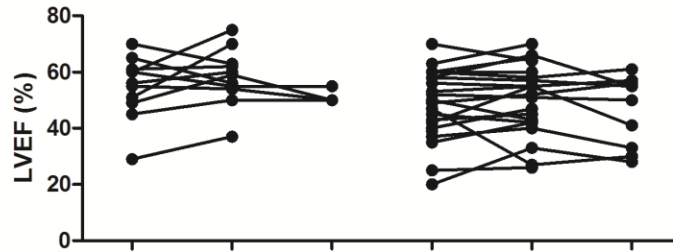

|                              | Diflunisal-treated    |                       |                     | Untreated             |                       |                       |
|------------------------------|-----------------------|-----------------------|---------------------|-----------------------|-----------------------|-----------------------|
|                              | Initial Visit         | 1-year Follow-up      | 2-year Follow-up    | Initial Visit         | 1-year Follow-up      | 2-year Follow-up      |
| N                            | 12                    | 12                    | 5                   | 23                    | 23                    | 10                    |
| TTR, median (range), mg/dL   | 24 (18 - 34)          | 30 (25 - 43)          | 31 (26 - 34)        | 23 (12 - 35)          | 22 (12 - 29)          | 20 (17 - 26)          |
| cTn-I, median (range), ng/mL | 0.050 (0.028 - 0.445) | 0.057 (0.006 - 0.328) | 0.064 (0.0 - 0.103) | 0.099 (0.023 - 0.279) | 0.096 (0.021 - 0.376) | 0.126 (0.090 - 0.279) |
| LVEF, median (range), %      | 58 (29 - 70)          | 57 (37 - 75)          | 50 (50 - 55)        | 50 (20 - 70)          | 53 (26 - 70)          | 52 (28 - 61)          |

**Supplemental Figure 2. Longitudinal study of prognostic parameters of overall survival in diflunisal-treated and untreated wild-type transthyretin amyloidosis (ATTRwt)** Individual values were obtained at baseline, 1-year and 2-year evaluations for serum transthyretin (TTR) (A), cardiac troponin (cTn-I) (B), and left ventricular ejection fraction (LVEF) (C). In each panel, diflunisal-treated cases are plotted on the LEFT and untreated cases on the RIGHT. The number (N) and median (range) values for each variable are shown in a table beneath the graphs.
